# Supplementary material
Source: HighWire-hosted journal article supplement (http://www.annfammed.org/highwire/filestream/8519/field_highwire_adjunct_files/7/Goldman_Supp_App_3.pdf)
Supplement: Goldman_Supp_App_3.pdf [file Goldman_Supp_App_3.pdf]

**Goldman R, Parker DR, Brown J, Walker J, Eaton CB, Borkan JM.  
Recommendations for a Mixed Methods Approach for Evaluating the Patient-  
Centered Medical Home. *Ann Fam Med.* 2015;13(2):.**

### **Supplemental Appendix 3. Clinician Demographic Questionnaire**

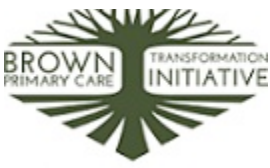

Practice \_\_\_\_\_

Date \_\_\_\_/\_\_\_\_/\_\_\_\_

## Clinician Demographic Questionnaire

(to be completed by all Physicians, NPs and Pas)

*Please circle the appropriate response or fill in the blanks below.*

Q1. What is your occupation?

- 1=NP
- 2=PA
- 3=Physician

Q2. What is your age?

\_\_\_\_\_ years

Q3. What is your gender?

- 1=Male
- 2=Female

Q4. What is your race/ethnicity? (circle all that apply)

- 1= White
- 2= Black or African American
- 3= American Indian
- 4= Asian
- 5= Native Hawaiian or Pacific Islander
- 6= Hispanic/Latino
- 7= Other \_\_\_\_\_

Q5. Are you Board Certified?

- 1=Yes Specialty \_\_\_\_\_
- 2= No

Q6. What type of residency/training did you complete? \_\_\_\_\_

Q7. How many years have you been in practice? \_\_\_\_\_

Q8. Which best describes your employment position?

- 1= Full or part owner
  - 2= Employed by other physician or group
  - 3= Employed by HMO
  - 4= Employed by other organization
- Specify the other organization \_\_\_\_\_

Q9. How long have you been working at this practice? \_\_\_\_\_
